# Supplementary material for: A resource of variant effect predictions of single nucleotide variants in model organisms
Source: PubMed Central journal article supplement (PMC6301329; doi:10.15252/msb.20188430), 2018-12-20
Supplement: MSB-14-e8430-s001.pdf [file MSB-14-e8430-s001.pdf]

## Expanded View Figures

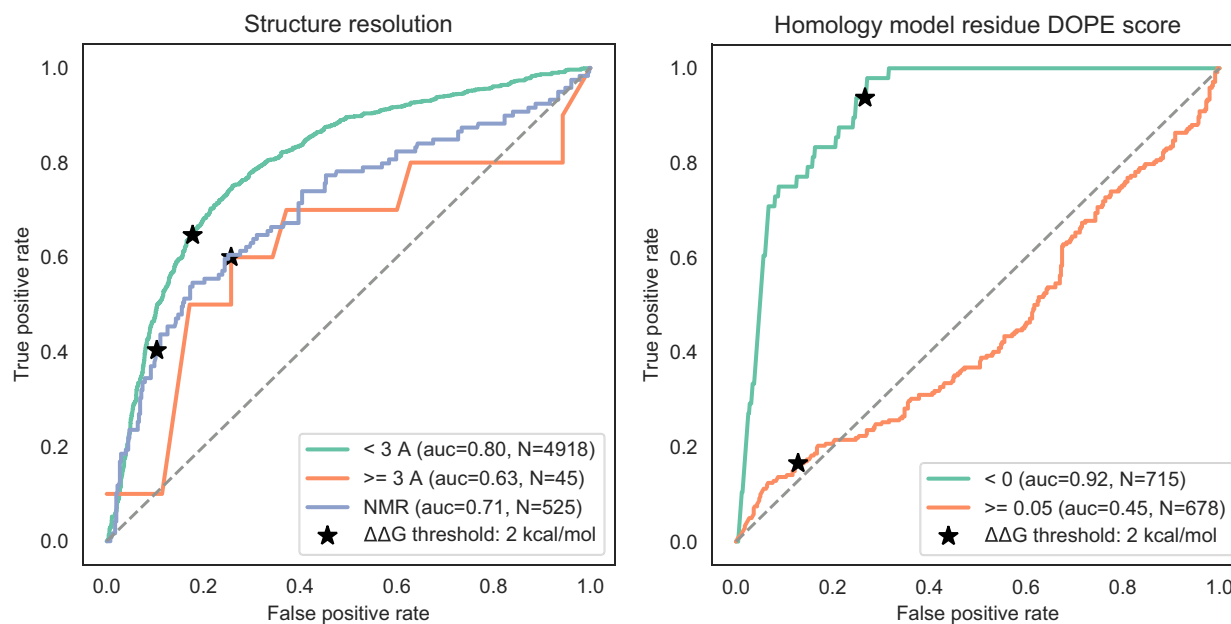

**Figure EV1. Impact of structural models on structure-based variant effect prediction.**

We obtained from the ProTherm database variants with experimentally determined impact on stability and classified them as destabilizing if  $\Delta\Delta G > 2$  and not destabilizing otherwise. FoldX-based predictions were tested on their capacity to discriminate between these two classes of variants using different types of experimental models and regions within homology models with different predicted quality.

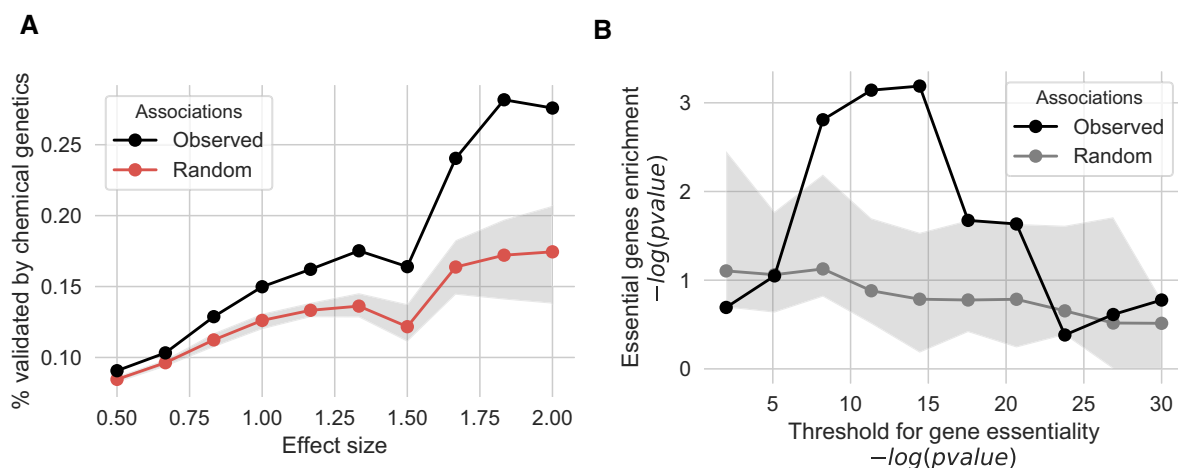

**Figure EV2. Gene and protein complex-level phenotype association analysis show significant but modest enrichment in prior knowledge of gene KO growth phenotypes.**

A The fraction of gene-phenotype associations that is validated by chemical genetic information derived from gene-deletion experiments. Shaded area reports the interquartile range over 100 iterations. The significance of the observed overlap was tested using permutation testing.

B Associations between protein complexes and conditions were benchmarked by calculating the enrichment of previously known gene-condition associations from gene-deletion studies. Shaded area reports the interquartile range over 100 iterations. An enrichment was observed for some cut-offs for the gene-deletion condition-dependent essentiality but only found to be better than random expectation for stringent cut-off.
